# Supplementary material
Source: HighWire-hosted journal article supplement (https://www.rcpjournals.org/highwire/filestream/13949/field_highwire_adjunct_files/1/Al-Hadithy_supplementary_material_S2.pdf)
Supplement: Al-Hadithy_supplementary_material_S2.pdf [file Al-Hadithy_supplementary_material_S2.pdf]

## Supplementary material S2: Case examples of good practice

*“Meeting with management to plan appropriately, ie minor adjustments when they became necessary, and scheduling of extra clinics to make up for lost service provision.”*

*“I had extremely supportive colleagues - but I was lucky. At the NHS level there was little support. At the departmental level I had a superb training programme director and clinical lead.”*

*“For my current pregnancy I undertook a risk assessment of my role and discussed this with my manager. I avoid contact with patients in enteric isolation, risks are made known to me by my MDT colleagues such as infections, radiation. Our on-call policy states pregnant women leave the on-call rota at 6 months however I felt I could have spoken to my manager about leaving the rota earlier should I have experienced difficulties.*

*During my last pregnancy I adjusted my start time and finish time to avoid the tube during peak rush hour. Physiotherapy”*
